# Supplementary material for: Photobiomodulation Drives MiR-136-5p Expression to Promote Injury Repair after Myocardial Infarction
Source: PubMed Central journal article supplement (PMC9066112; doi:10.7150/ijbs.71440), 2022-04-18
Supplement: ijbsv18p2980s1.pdf [file ijbsv18p2980s1.pdf]

### **Supplementary Figure 1**

The TargetScan Mouse algorithm predicts target genes that bind to miR-136-5p and are associated with proliferation regulation.

### **Supplementary Figure 2**

LED-Red illumination device diagram

### **Supplementary Figure 3**

The effect of overexpression of Ino80 on CM proliferation was detected using (A) EdU, (B) pH3. Arrows indicate proliferative signals, n = 3, Scale bar = 20  $\mu\text{m}$ . \*\*\* $P < 0.001$  vs. CTL. The data represent the mean  $\pm$  SEM.

Supplementary Figure 1.

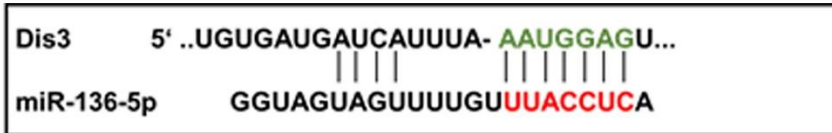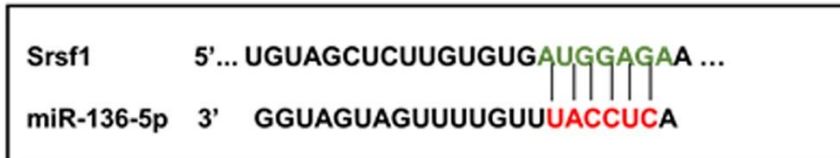

**Supplementary Figure 2.**

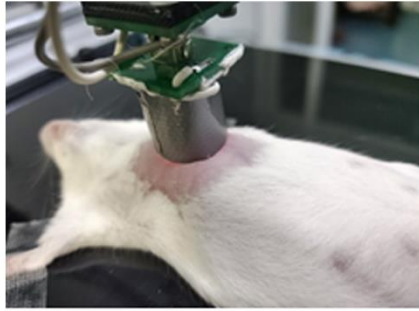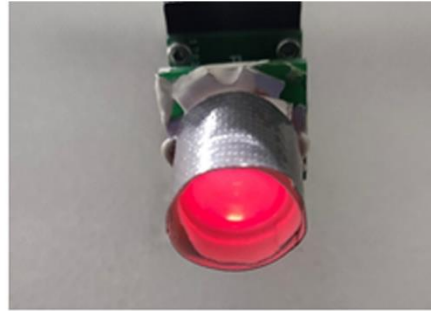

**LED therapy**

Supplementary Figure 3

A

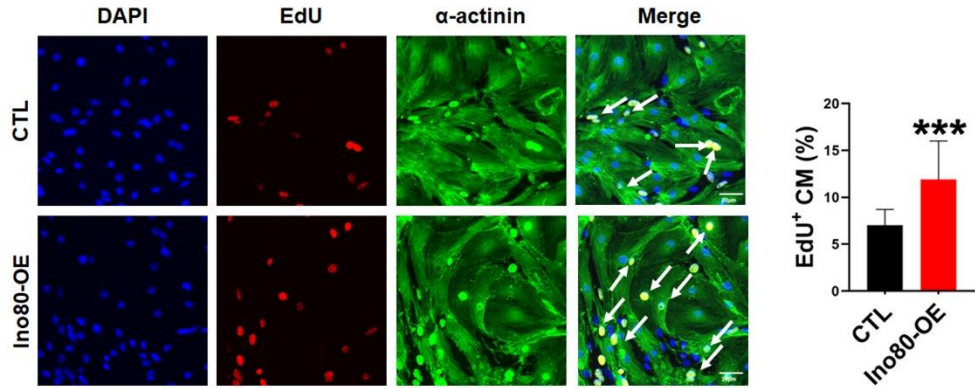

B

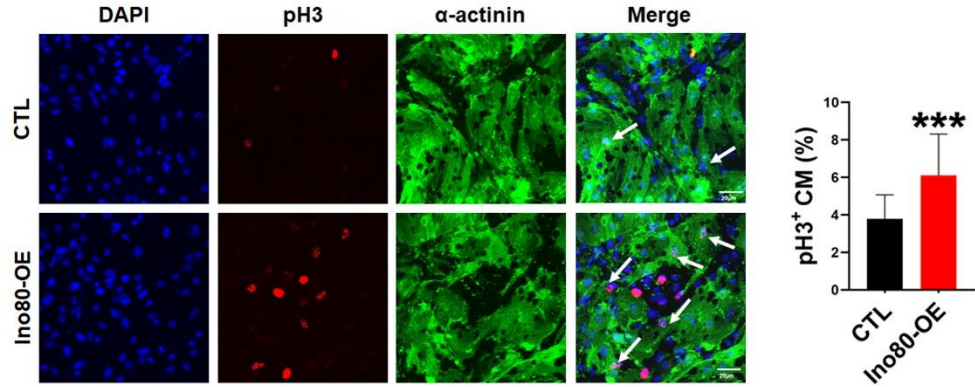

**Table S1 Primer sequences**

| GENE        | Forward primer             | Reverse primer           | Random primer                                           |
|-------------|----------------------------|--------------------------|---------------------------------------------------------|
| miR-451a    | AAACCGTTACCATTA<br>CTGAGTT | ATCCAGTGCAGGGT<br>CCGAGG | GTCGTATCCAGTGCAGGGTCCGAGGT<br>ATTCGCACTGGATACGACAACCTCA |
| miR-466i-5p | TGTGTGTGTGTGTGTG<br>TGTG   | ATCCAGTGCAGGGT<br>CCGAGG | GTCGTATCCAGTGCAGGGTCCGAGGT<br>ATTCGCACTGGATACGACCACACA  |
| miR-690     | AAAGGCTAGGCTCAC<br>AAAAA   | ATCCAGTGCAGGGT<br>CCGAGG | GTCGTATCCAGTGCAGGGTCCGAGGT<br>ATTCGCACTGGATACGACTTTGGT  |
| miR-6933-5p | TGGCGGCAGTCAGGA<br>TACTT   | ATCCAGTGCAGGGT<br>CCGAGG | GTCGTATCCAGTGCAGGGTCCGAGGT<br>ATTCGCACTGGATACGACACAGGT  |
| miR-7226-5p | GCCAGGGAAGTTGAT<br>TGGGAAG | ATCCAGTGCAGGGT<br>CCGAGG | GTCGTATCCAGTGCAGGGTCCGAGGT<br>ATTCGCACTGGATACGACCCCTTC  |
| miR-135b-5p | TATGGCTTTTCATTC<br>TATGTG  | ATCCAGTGCAGGGT<br>CCGAGG | GTCGTATCCAGTGCAGGGTCCGAGGT<br>ATTCGCACTGGATACGACGCCATA  |
| miR-136-5p  | CACICCAATTTGTTTG<br>ATGATG | ATCCAGTGCAGGGT<br>CCGAGG | GTCGTATCCAGTGCAGGGTCCGAGGT<br>ATTCGCACTGGATACGACTGGAGT  |
| miR-219a-5p | CCIGATTGTCCAAAC<br>GAATTT  | ATCCAGTGCAGGGT<br>CCGAGG | GTCGTATCCAGTGCAGGGTCCGAGGT<br>ATTCGCACTGGATACGACCAATCA  |
| miR-21a-3p  | CAACAGCAGTCGATG<br>GGTT    | ATCCAGTGCAGGGT<br>CCGAGG | GTCGTATCCAGTGCAGGGTCCGAGGT<br>ATTCGCACTGGATACGACCTGTTG  |
| miR-30a-5p  | TGTAAACATCCTCGA<br>CTGGAAG | ATCCAGTGCAGGGT<br>CCGAGG | GTCGTATCCAGTGCAGGGTCCGAGGT<br>ATTCGCACTGGATACGACTTTACA  |
| Ino80       | GCAAAGCCCCTTTAT<br>CTTCAGT | CCAGAGGTTTCGCC<br>AAGCAA |                                                         |
